# Supplementary material for: Discordance of Biomarker Expression Profile between Primary Breast Cancer and Synchronous Axillary Lymph Node Metastasis in Preoperative Core Needle Biopsy
Source: MDPI journal article supplement (doi:10.3390/diagnostics14030259), 2024-01-25
Supplement: s1 [file s1]

**Table S1.** Clinical-pathological features and biomarkers expression on core needle biopsies in matched **divergent** primary tumors and axillary lymph node metastases of the present series. **Discrepancies** are outlined in bold and colored in yellow.

| Case N. | Age | Size/Laterality | Histology                           | Nuclear grading | Necrosis | ER (%) | PR (%) | Ki67 (%) | HER2 | FISH      |
|---------|-----|-----------------|-------------------------------------|-----------------|----------|--------|--------|----------|------|-----------|
| 1a*     | 69  | 3 cm/R          | ILC                                 | 2               | NA       | 90%    | 0%     | 8%       | 0    | Neg.      |
| 1b*     |     |                 | ILC                                 | 3               |          | 90%    | 0%     | 8%       | 2    |           |
| 2a*     | 35  | 1.3 cm/R        | NST                                 | 2               | Present  | 5%     | 0%     | 30%      | 3    |           |
| 2b*     |     |                 | NST                                 | 3               |          | 50%    | 5%     | NA       | 3    |           |
| 3a*     | 64  | 1.3 cm/R        | NST micropapillary                  | 2               | NA       | 90%    | 90%    | 25%      | 2    | Amplified |
| 3b1*    |     |                 | ILC                                 | 3               |          | 0%     | 0%     | 70%      | 3    |           |
| 3b2*    |     |                 | ILC                                 | 2               |          | 90%    | 70%    | 30%      | 1    |           |
| 4a*     | 48  | 2 cm/L          | NST                                 | 2               | Absent   | 90%    | 90%    | 40%      | 1    | Neg.      |
| 4b*     |     |                 | NST (different pattern, more solid) | 2               |          | 90%    | 90%    | 40%      | 2    |           |
| 5a*     | 66  | 1.1 cm/L        | NST                                 | 2               | Absent   | 90%    | 60%    | 20%      | 1    | Neg.      |
| 5b*     |     |                 | NST (different pattern, cribriform) | 2               |          | 90%    | 60%    | 20%      | 2    |           |
| 6a*     | 51  | 4 cm/L          | NST                                 | 2               | Absent   | 90%    | 20%    | 25%      | 1    | Neg.      |
| 6b*     |     |                 | NST micropapillary                  | 2               |          | 90%    | 20%    | 25%      | 2    |           |
| 7a*     | 72  | 2.1 cm/R        | NST                                 | 2               | Absent   | 85%    | 50%    | 15%      | 1    | Neg.      |
| 7b*     |     |                 | NST (different pattern, more solid) | 3               |          | 85%    | 4%     | 50%      | 2    |           |
| 8a*     | 45  | 2.8 cm/R        | NST/ILC                             | 3               | NA       | 70%    | 70%    | 40%      | 1    | Neg.      |
| 8b*     |     |                 | NST                                 | 3               |          | 70%    | 70%    | 40%      | 2    |           |
| 9a*     | 61  | 2.1 cm/R        | NST/ILC                             | 2               | NA       | 8%     | 0%     | 40%      | 1    | Neg.      |
| 9b*     |     |                 | NST (different pattern, more solid) | 2               |          | 50%    | 5%     | 40%      | 2    |           |
| 10a*    | 67  | 2 cm/R          | NST/ILC                             | 3               | NA       | 0%     | 0%     | 45%      | 3    |           |
| 10b*    |     |                 | NST                                 | 2               |          | 95%    | 0%     | 12%      | 3    |           |
| 11a1*   | 44  | 1.2 cm/R        | NST (clear cell/glicogen rich)      | 3               | Absent   | 90%    | 50%    | 30%      | 1    | Neg.      |
| 11a2*   |     | 2.5 cm/R        | NST (clear cell/glicogen rich)      | 3               |          | 90%    | 5%     | 20%      | 2    |           |
| 11b*    |     |                 | NST                                 | 3               |          | 90%    | 10%    | 32%      | 1    |           |
| 12a*    | 81  | 0.8 cm/R        | ILC                                 | 3               | NA       | 85%    | 0%     | 5%       | 1    |           |
| 12b*    |     |                 | ILC solid                           | 3               |          | 85%    | 0%     | 5%       | 2    | Neg.      |
| 13a*    | 64  | 3 cm/L          | NST (different pattern)             | 2               | NA       | 90%    | 50%    | 15%      | 1    | Neg.      |
| 13b*    |     |                 | NST (different pattern)             | 2               |          | 90%    | 50%    | 25%      | 2    | Neg.      |
| 14a*    | 54  | 3 cm/R          | ILC                                 | 2               | NA       | 95%    | 90%    | 10%      | 1    |           |
| 14b*    |     |                 | ILC solid                           | 2               |          | 95%    | 90%    | 8%       | 2    |           |
| 15a*    | 78  | 1.6 cm/R        | NST/ILC                             | 2               | NA       | 95%    | 10%    | 5%       | 0    |           |
| 15b*    |     |                 | NST                                 |                 |          | 90%    | 90%    | 10%      | 1    |           |
| 16a*    | 42  | 6 cm/L          | NST                                 | 2               | NA       | 95%    | 10%    | 40%      | 0    | Neg.      |
| 16b*    |     |                 | ILC                                 | 3               |          | 95%    | 80%    | 35%      | 2    |           |
| 17a*    | 60  | 2.5 cm/L        | NST                                 | 3               | NA       | 10%    | 0%     | 30%      | 3    |           |
| 17b*    |     |                 | NST                                 | 3               |          | 95%    | 0%     | 40%      | 3    |           |
| 18a*    | 52  | 2.3 cm/R        | Mucinous                            | 2               | NA       | 95%    | 20%    | 20%      | 1    |           |
| 18b*    |     |                 | NST                                 | 2               |          | 90%    | 1%     | 30%      | 3    |           |
| 19a*    | 59  | 2 cm/R          | ILC/NST                             | 2               | NA       | 95%    | 70%    | 10%      | 2    | Neg.      |
| 19b*    |     |                 | ILC                                 | 2               |          | 95%    | 10%    | 20%      | 2    |           |
| 20a*    | 74  | 5 cm/R          | NST                                 | 2               | NA       | 95%    | 5%     | 15%      | 3    |           |
| 20b*    |     |                 | NST                                 | 2               |          | 95%    | 60%    | 10%      | 3    |           |
| 21a*    | 73  | 0.5 cm/R        | NST                                 | 2               | NA       | 95%    | 95%    | 7%       | 1    |           |
| 21b*    |     |                 | NST                                 | 3               |          | 5%     | 0%     | 45%      | 3    |           |
| 22a*    | 70  | 2.6 cm/R        | ILC apocrine <sup>‡</sup>           | 2               | NA       | 95%    | 95%    | 7%       | 1    |           |
| 22b*    |     |                 | NST/ILC                             | 3               |          | 0%     | 5%     | 40%      | 3    |           |
| 23a*    | 60  | 2.5 cm/R        | NST (different pattern)             | 3               | NA       | 90%    | 50%    | 35%      | 1    |           |
| 23b*    |     |                 | NST (different pattern)             | 3               |          | 90%    | 0%     | 25%      | 2    |           |
| 24a*    | 46  | NA/R            | NST                                 | 2               | NA       | 85%    | 70%    | 35%      | 3    |           |
| 24b*    |     |                 | NST micropapillary                  | 2               |          | 85%    | 70%    | 35%      | 1    |           |
| 25a*    | 64  | 2 cm/R          | NST                                 | 2               | Absent   | 40%    | 20%    | 20%      | 1    |           |
| 25b*    |     |                 | NST                                 | 3               |          | 85%    | 20%    | 30%      | 2    |           |
| 26a*    | 57  | 4 cm/L          | NST/ILC (different pattern)         | 2               | Absent   | 95%    | 3%     | 15%      | 1    |           |
| 26b*    |     |                 | NST/ILC (different pattern)         | 2               |          | 95%    | 35%    | 40%      | 1    |           |
| 27a*    | 54  | NA/R            | Mucinous                            | 2               | Absent   | 95%    | 70%    | 15%      | 1    |           |
| 27b*    |     |                 | NST                                 | 3               |          | 95%    | 55%    | 45%      | 1    |           |
| 28a*    | 71  | 2.3 cm/R        | Metaplastic carcinoma               | 3               | Absent   | 95%    | 5%     | 25%      | 2    | Neg.      |
| 28b*    |     |                 | NST                                 | 3               |          | 0%     | 0%     | 65%      | 0    |           |
| 29a*    | 65  | 1.5 cm/L        | NST                                 | 3               | Absent   | 90%    | 10%    | 15%      | 2    | Neg.      |
| 29b*    |     |                 | NST                                 | 3               | Present  | 90%    | 10%    | 15%      | 2    | Amplified |
| 30a*    | 50  | NA/R            | NST                                 | 2               | Present  | 95%    | 70%    | 40%      | 2    | Neg.      |
| 30b*    |     |                 | NST                                 | 2               |          | 80%    | 70%    | 40%      | 3    |           |

\*same patient ("a": breast tumor; "b": nodal metastasis).

<sup>‡</sup>staining positive for androgen receptors and GCDFF-15 at immunohistochemistry.

Abbreviations: ER: estrogen receptors, PR: progesterone receptors, HER2: human epidermal growth factor receptor-2, R: right, ILC: invasive lobular carcinoma, NA: not available, NST: no special type, L: left.
